# Supplementary material for: Drug repositioning based on network-specific core genes identifies potential drugs for the treatment of autism spectrum disorder in children
Source: PubMed Central journal article supplement — Comput Struct Biotechnol J. 2021 Jul 1;19:3908–21. doi: 10.1016/j.csbj.2021.06.046 (PMC8280514; doi:10.1016/j.csbj.2021.06.046), 2021-07-01
Supplement: mmc1.pdf [file mmc1.pdf]

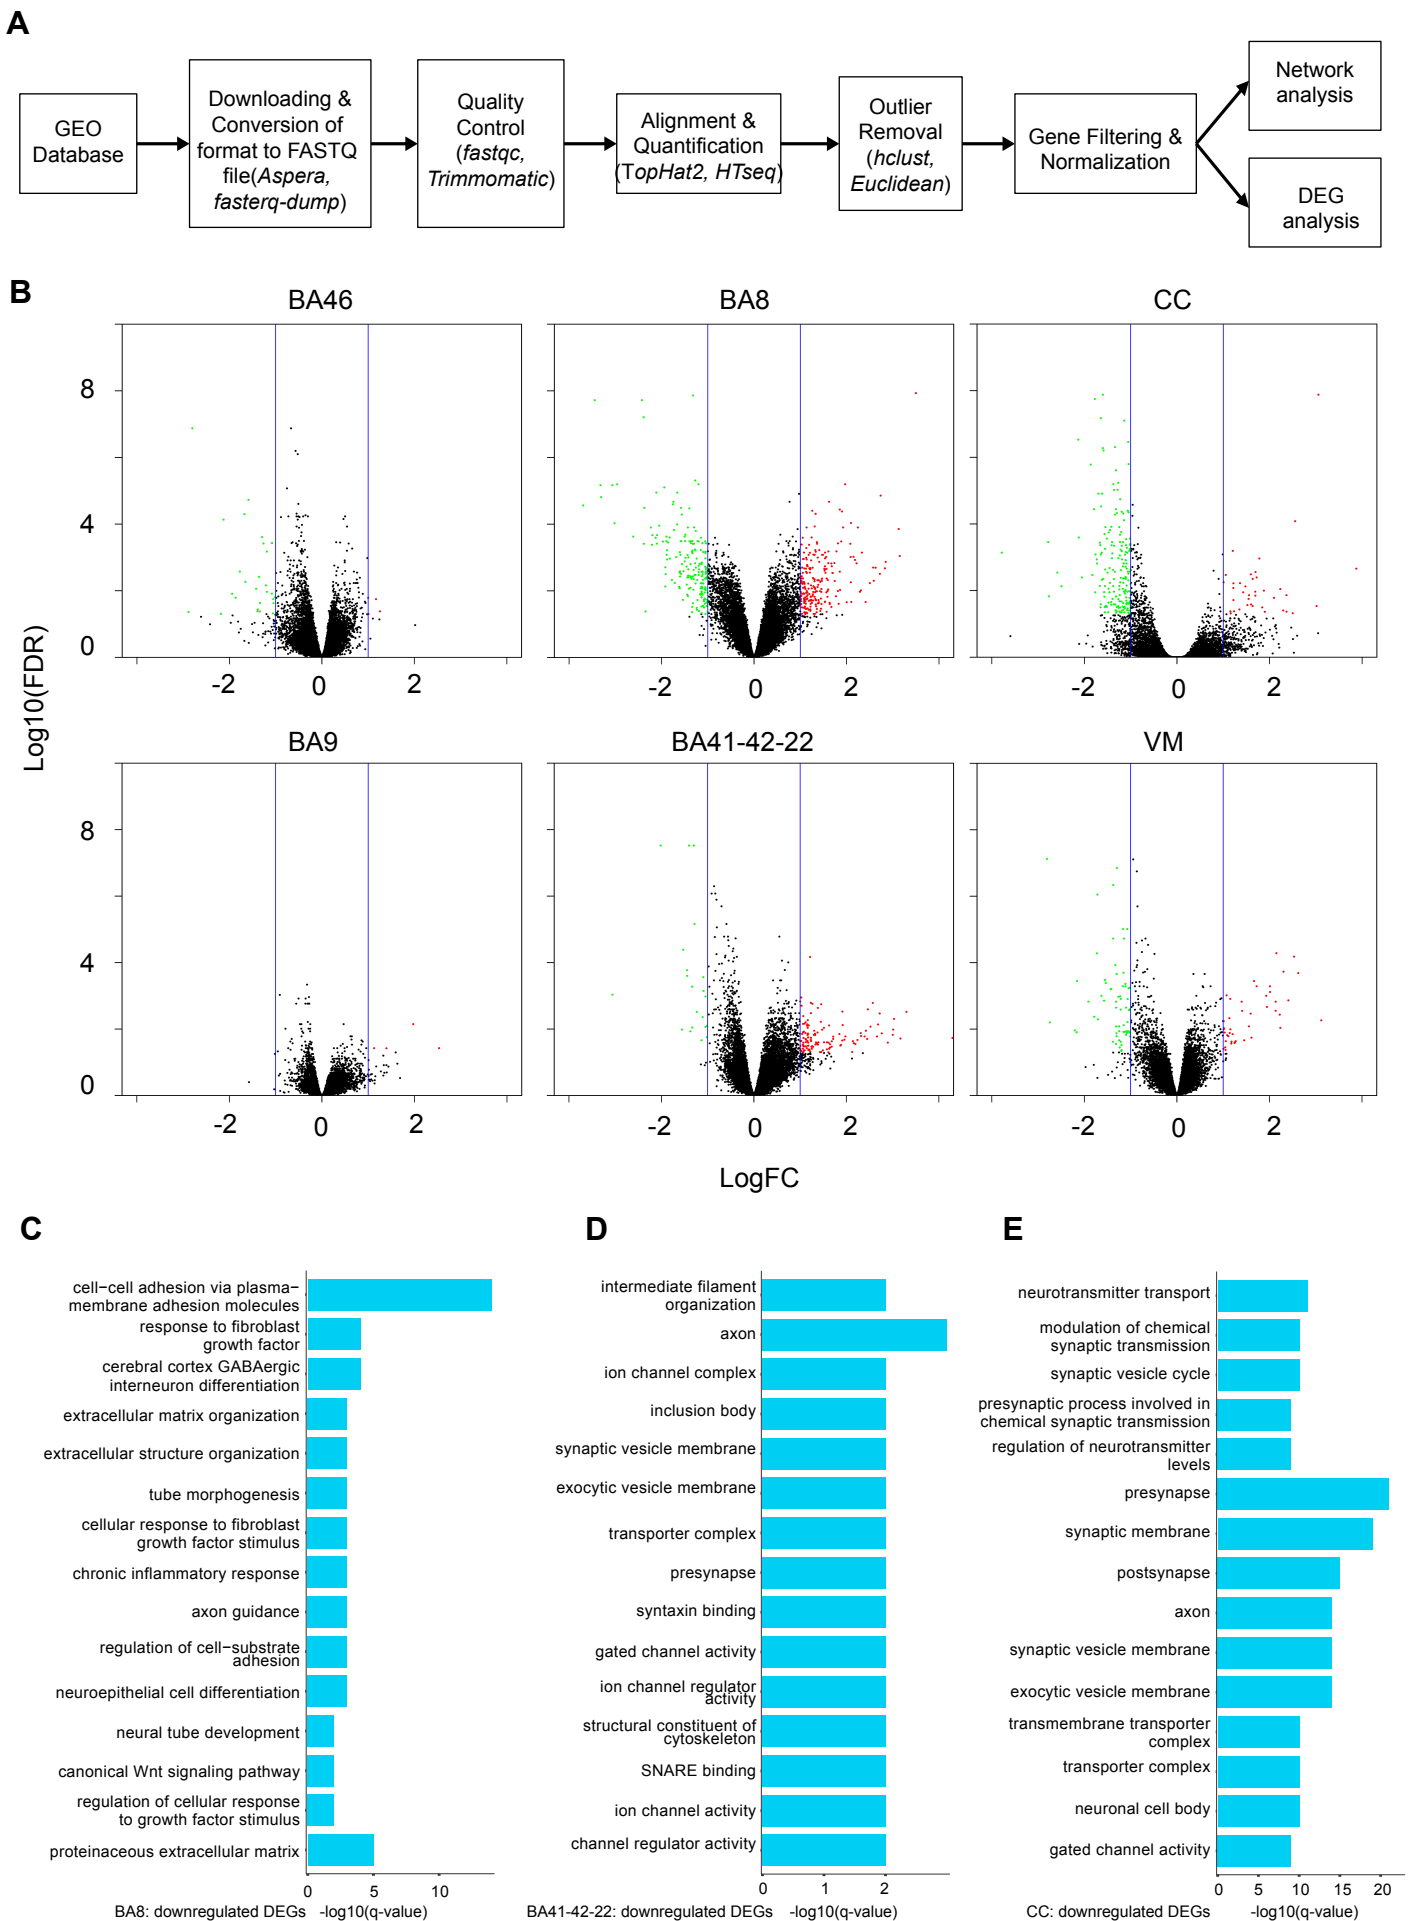

**Figure S1.** Transcriptome data and GO enrichment analysis of downregulated DEGs in the different brain regions. (A) Pipeline of RNA-Seq raw data analysis. (B) Volcano plot of gene expression analysis in different brain areas. Red indicates upregulated DEGs, and green indicates downregulated DEGs. The x-axis specifies the  $\log_2(\text{fold change, FC})$ , and the y-axis specifies the FDR negative logarithm in base 10. (C) Top 15 enriched GO terms for the downregulated genes in BA8. (D) Top 15 enriched GO terms for the downregulated genes in BA41-42-22. (E) Top 15 enriched GO terms for the downregulated genes in CC. The x-axis shows the  $-\log_{10}(q\text{-value})$ , and the y-axis shows the GO terms.

**A**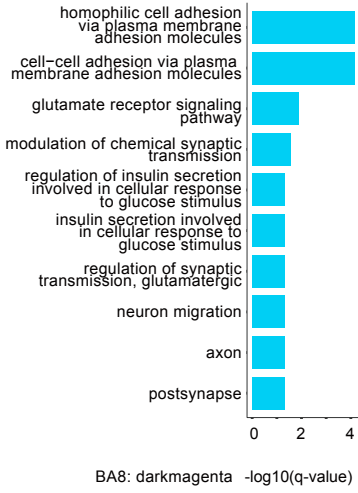**B**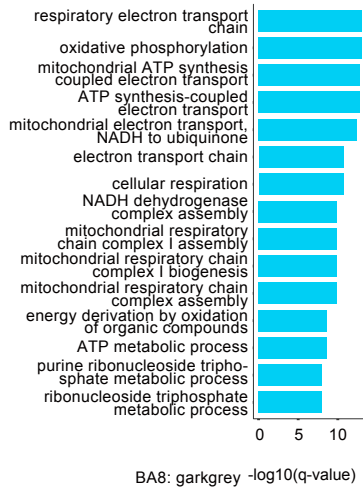**C**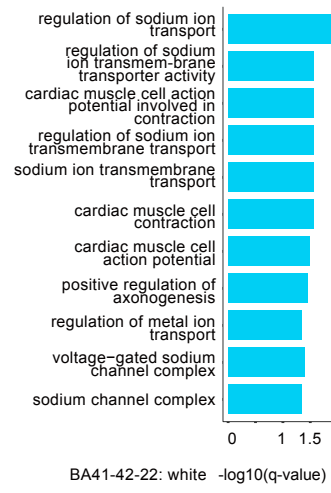**D**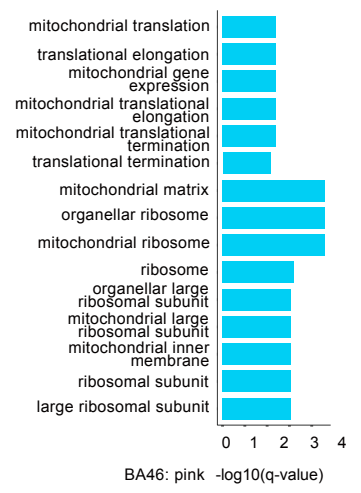**E**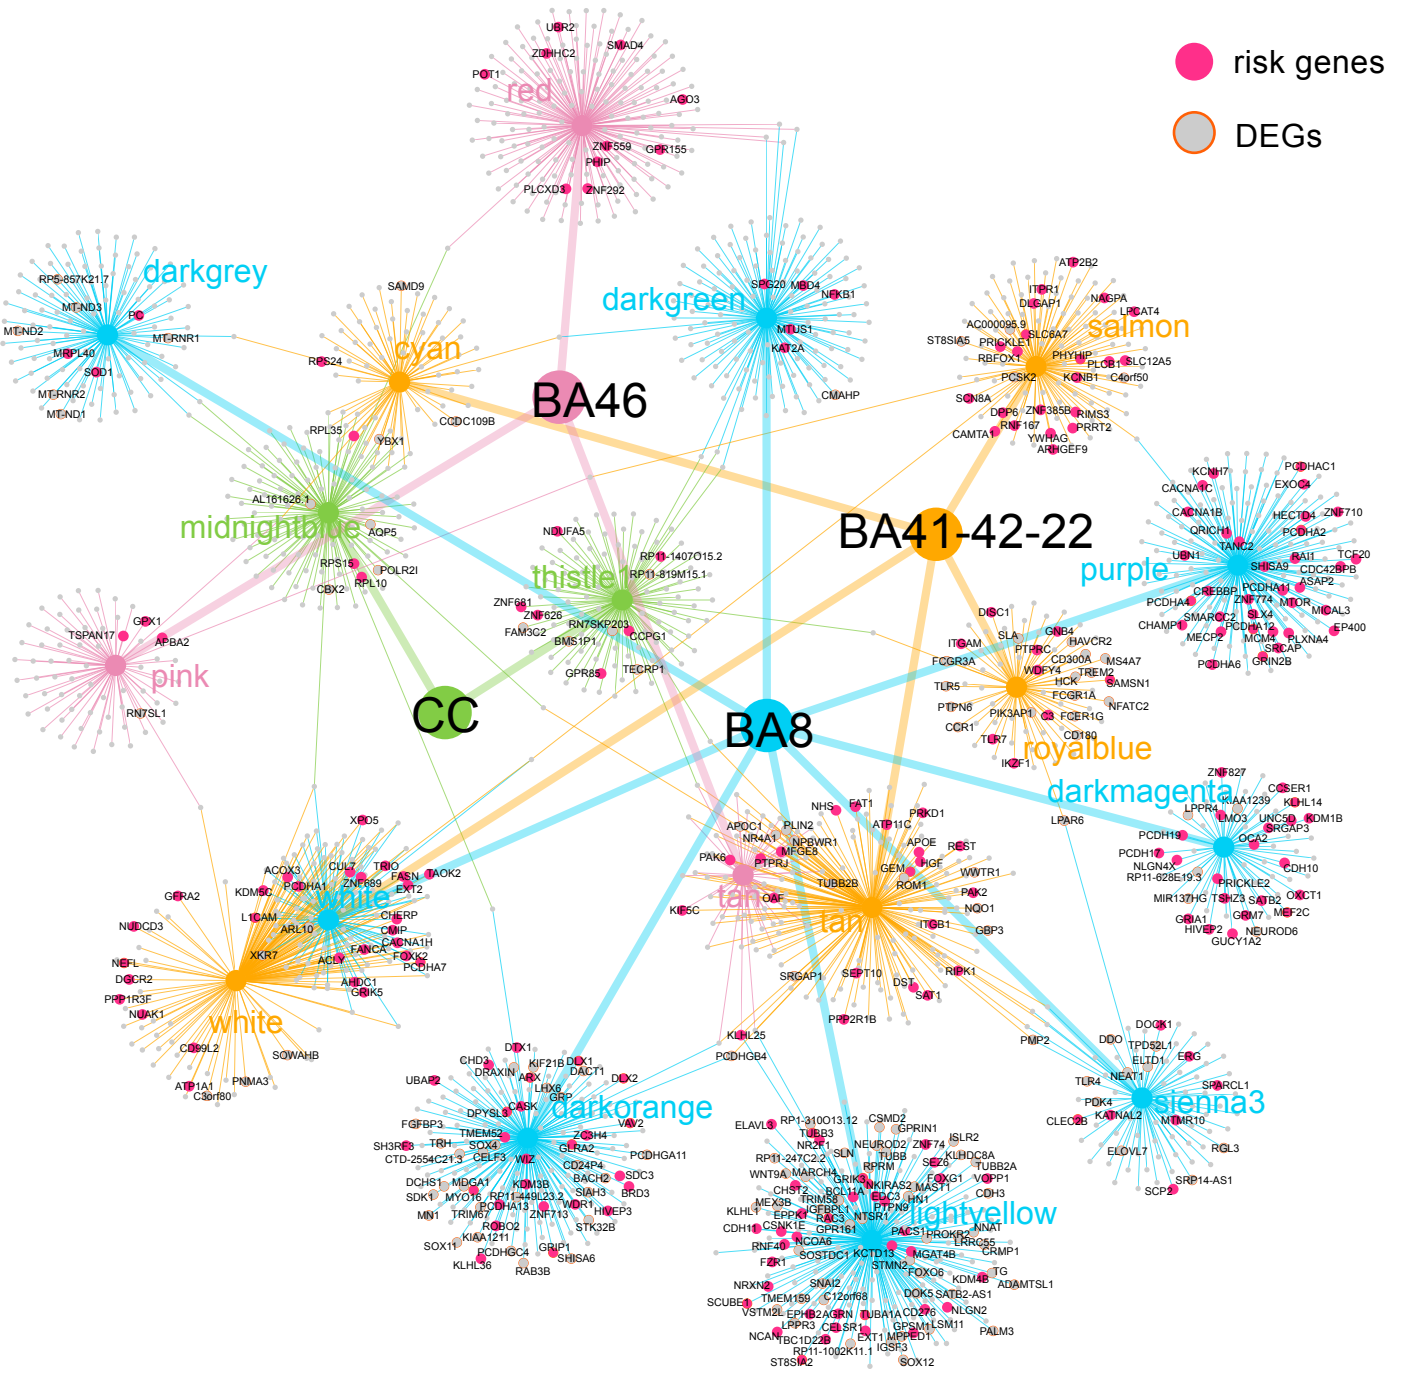

**Figure S2.** Functional enrichment analysis of SCMs and network quality assessment. (A-D) GO enrichment analysis of genes in the SCMs of brain regions. e Overlap between the ASD risk gene set and SCMs. The magenta nodes in the SCMs represent the reported pathogenic genes of ASD. The red nodes represent the region-specific DEGs.

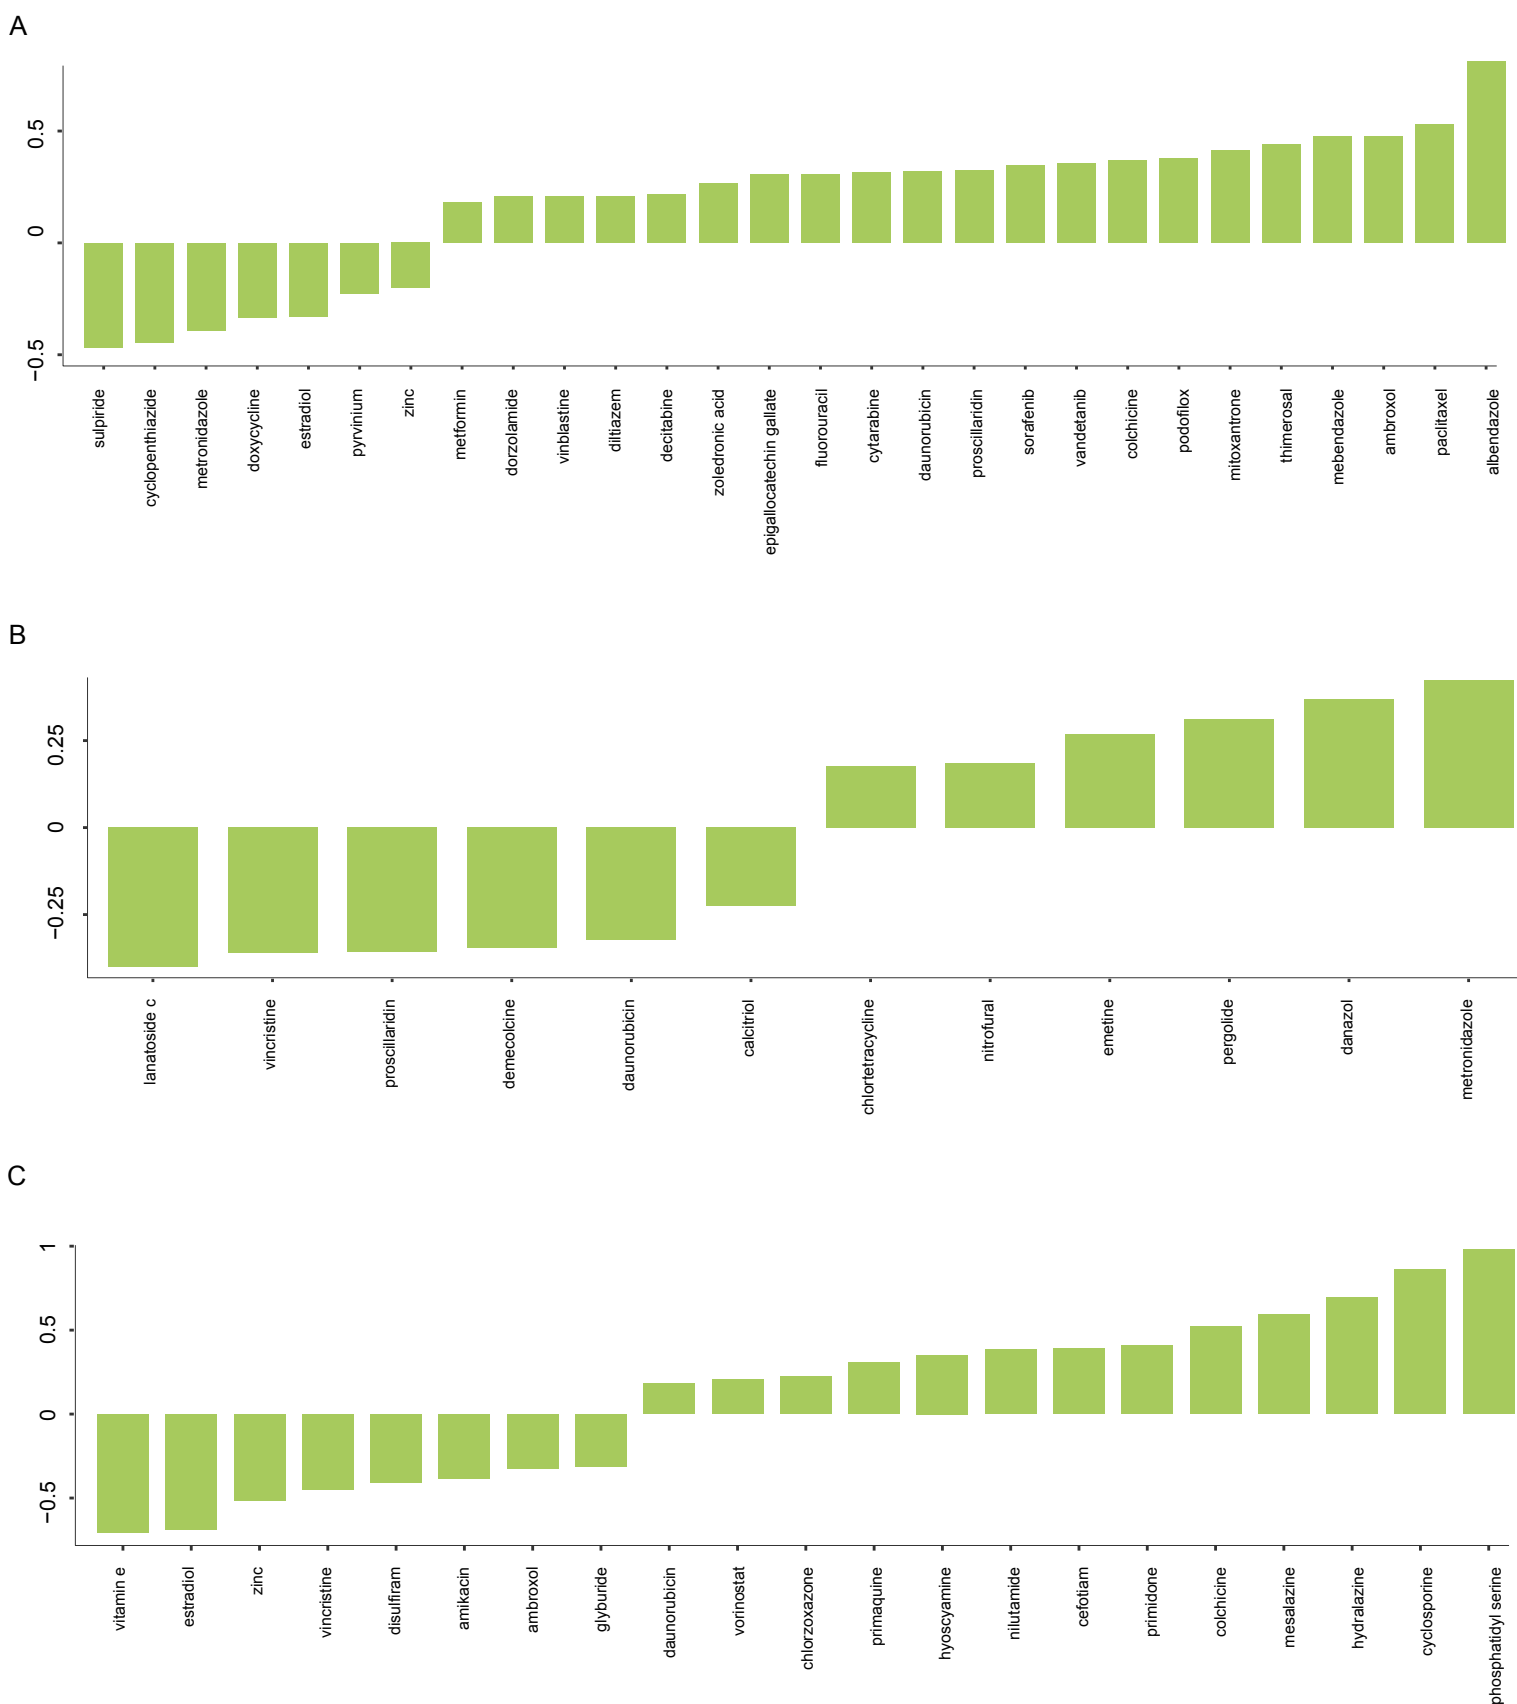

**Figure S3.** Significant dtNESs from other brain regions. (A) Drug candidate dtNESs from BA8. (B) Drug candidate dtNESs from BA46. (C) Drug candidate dtNESs from CC. The y-axis shows the positive dtNES -1 and negative dtNES + 1, and the x-axis shows the drug name. The vertical bars indicate the computationally predicted therapeutic scores for the drugs based on comparison of the gene expression signatures of the drugs with the NCGs. A negative score means that a drug exhibits an expression pattern that is oppositional to the disease; such, drugs are potential therapeutic drugs.

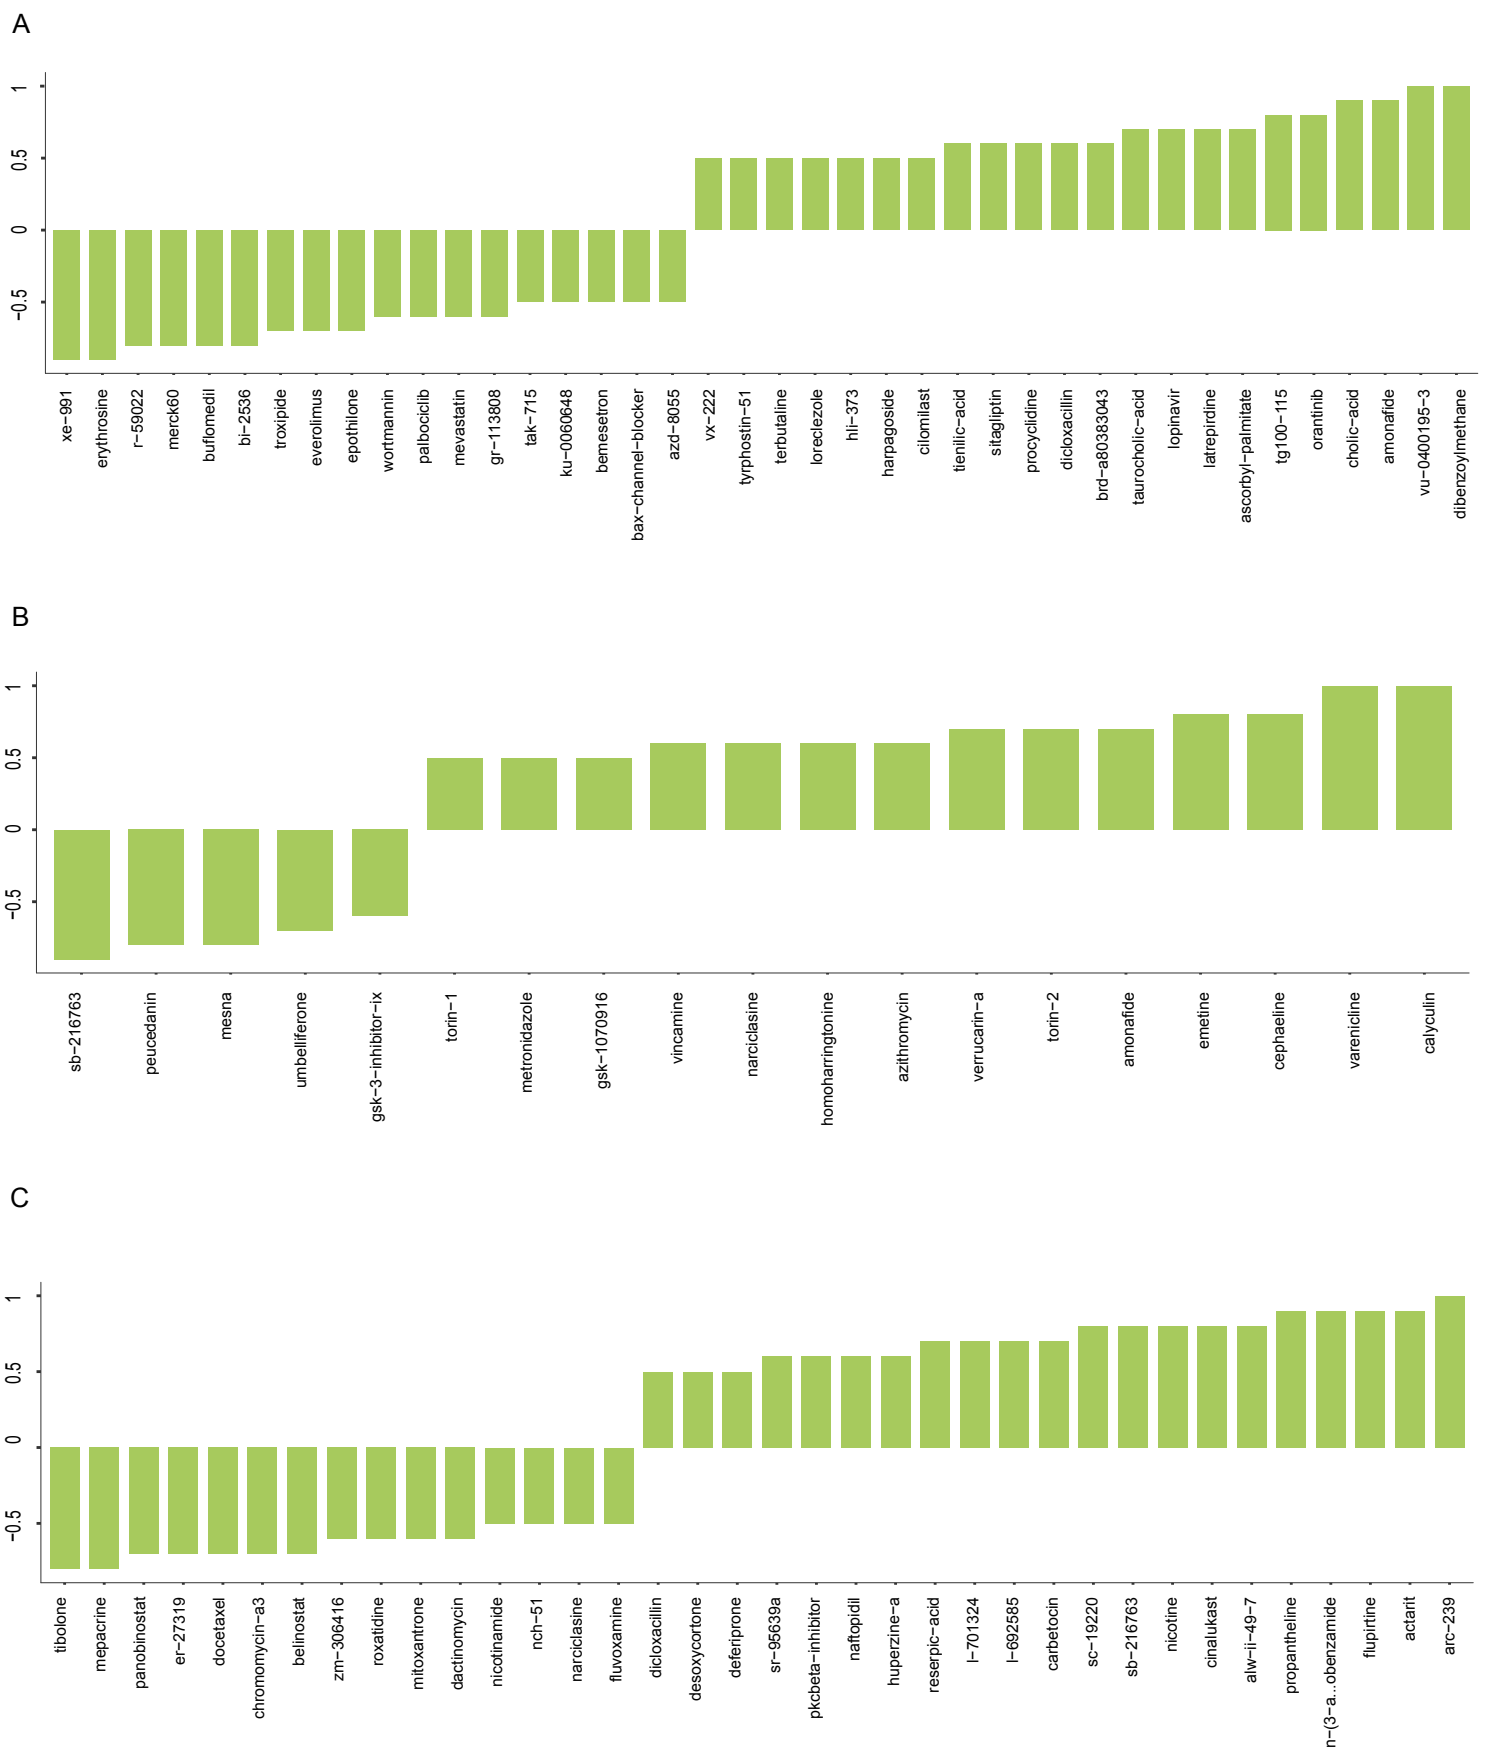

**Figure S4.** Significant CMap connectivity scores from other brain regions. (A) Drug candidate score from BA8. (B) Drug candidate scores from BA46. (C) Drug candidate scores from CC. The y-axis shows the scores ((positive score - 95)/10 and (negative score + 95)/10) and the x-axis shows the names of the drugs. The vertical bars indicate the computationally predicted therapeutic scores for the drugs based on comparison of the gene expression signatures of the drugs with the NCGs. A negative score indicates that a drug exhibits an expression pattern that is oppositional to the disease; such, drugs are potential therapeutic drugs.

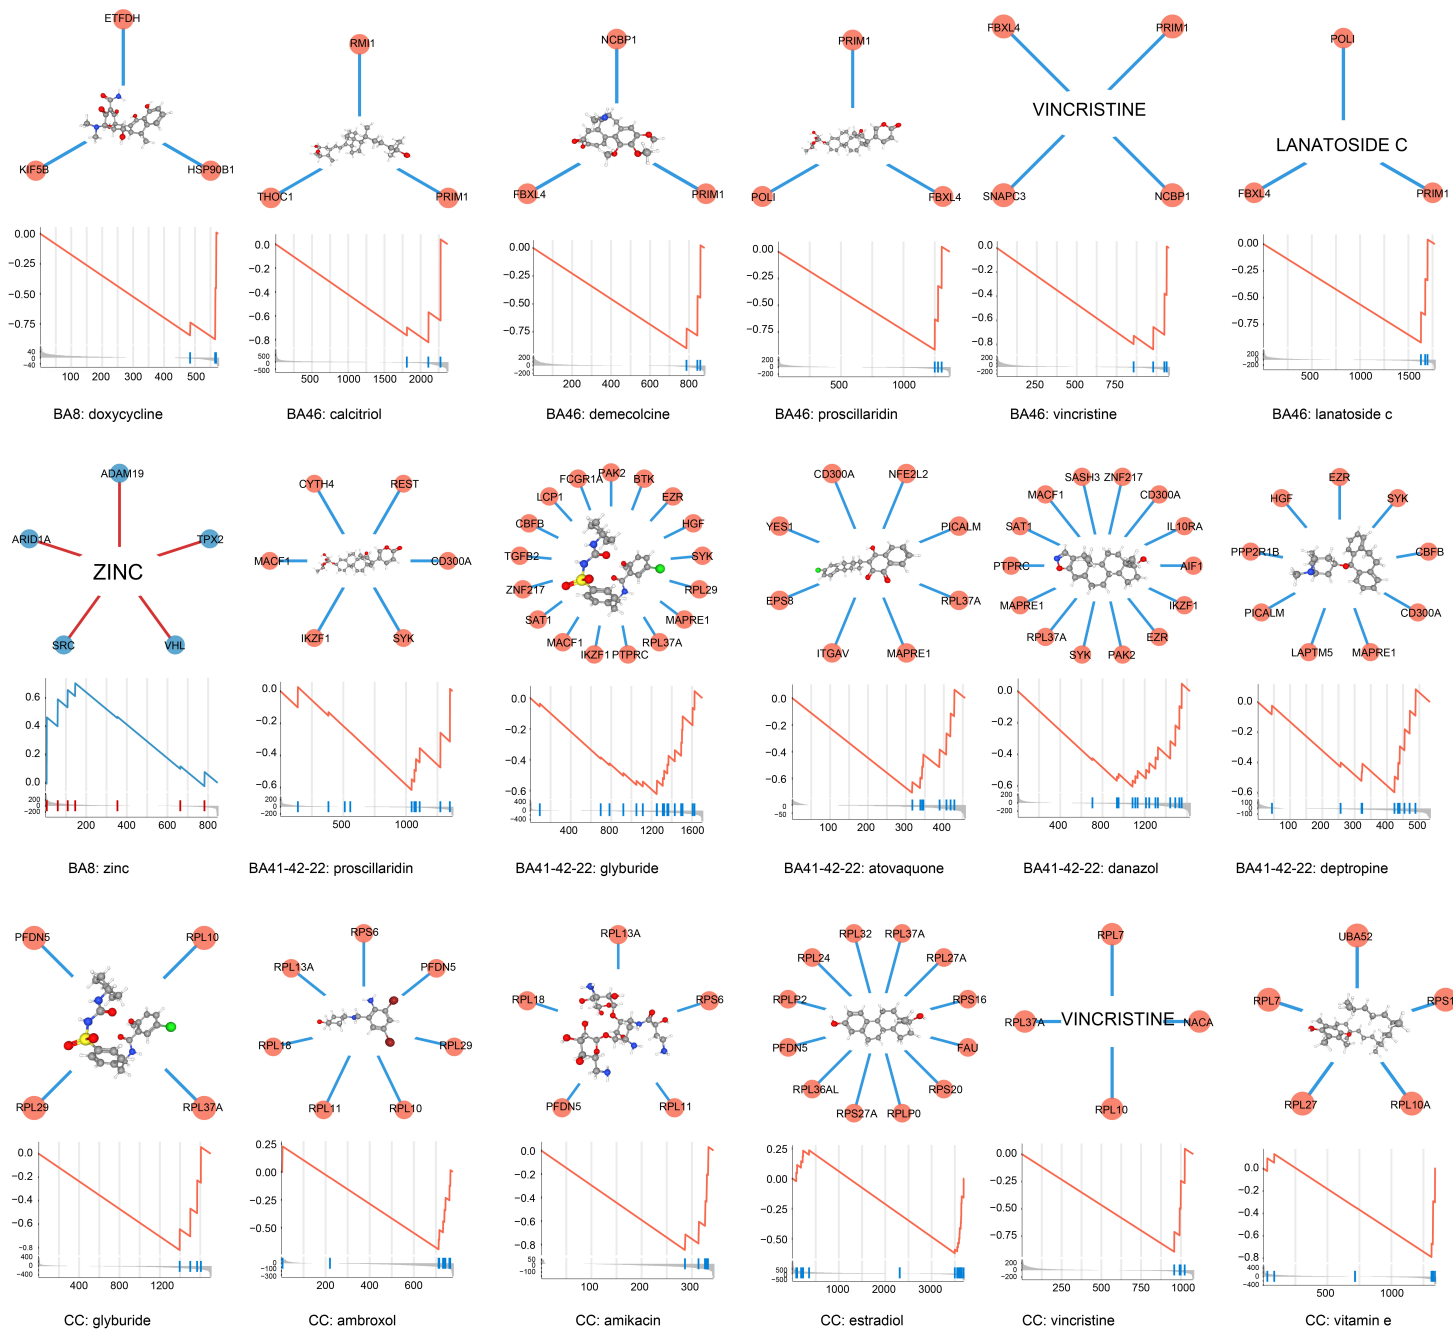

**Figure S5.** Target NCGs and GSEA results of other drug candidates that identified by dtGSEA.

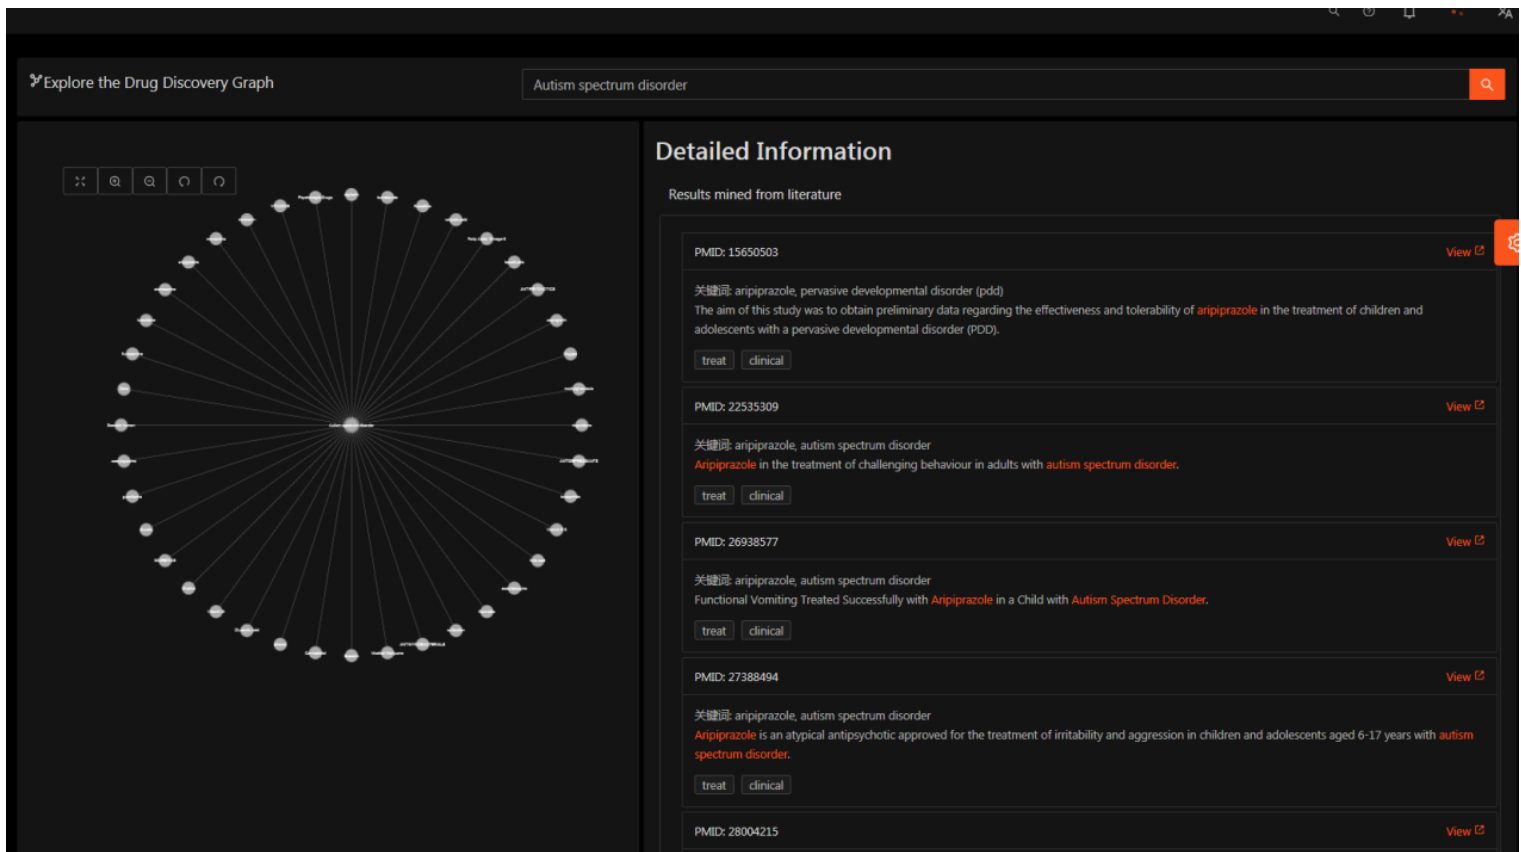

**Figure S6.** MCKG visualize in the AskBob platform. The nodes in the outer circle represent compounds, the middle node the disease. Click on each edge to pop up related articles information on the right side of the interface.

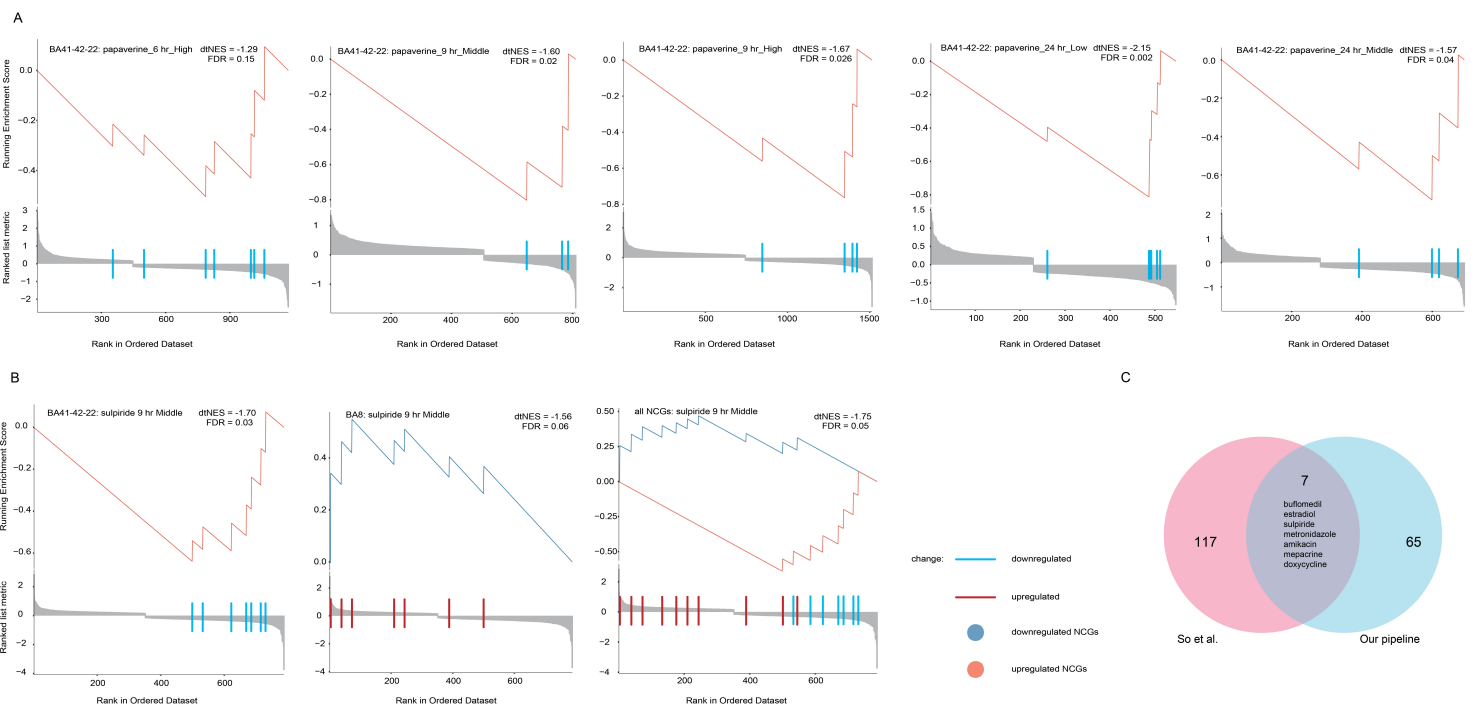

**Figure S7.** The result of NCGS expression was reversed in toxicogenomic data. a GSEA results of papaverine in rat in vivo transcriptomics data. b GSEA results of sulpiride in rat in vivo transcriptomics data. c Venn diagram.
